# Supplementary material for: Ventricular and Atrial Remodeling after Transcatheter Edge-to-Edge Repair: A Pilot Study
Source: MDPI journal article supplement (doi:10.3390/jpm12111916), 2022-11-16
Supplement: s1 [file s1]

## Supplementary Materials

# Ventricular and Atrial Remodeling after Transcatheter Edge-to-Edge Repair: A Pilot Study

**Supplementary Table S1.** Medical therapy before and after TEER procedure.

|               | Baseline (n=24) | Follow-Up (n = 24) | p-Value |
|---------------|-----------------|--------------------|---------|
| Beta-blockers | 21 (87.5)       | 21 (87.5)          | 1.000   |
| ACE-I         | 4 (16.7)        | 4 (16.7)           | 1.000   |
| ARB           | 8 (33.3)        | 10 (41.7)          | 0.766   |
| MRA           | 22 (91.7)       | 22 (91.7)          | 1.000   |
| Diuretics     | 23 (95.8)       | 23 (95.8)          | 1.000   |

Legend: ACE-I, angiotensin-converting enzyme inhibitors; ARB, angiotensin receptor blockers; MRA, mineralocorticoid receptor antagonist.

**Supplementary Table S2.** Baseline and follow-up assessment according to mitral regurgitation etiology.

|                                | Baseline Assessment,<br>Median [IQR] | Follow-Up Assessment,<br>Median [IQR] | p-Value |
|--------------------------------|--------------------------------------|---------------------------------------|---------|
| PRIMARY MR (n = 11)            |                                      |                                       |         |
| LVEDD (mm)                     | 50.0 [49.0-59.0]                     | 46.0 [42.0-57.0]                      | 0.005   |
| LVESD (mm)                     | 42.0 [37.0-49.0]                     | 40.0 [38.0-45.0]                      | 0.284   |
| RWT                            | 0.32 [0.29-0.38]                     | 0.35 [0.31-0.38]                      | 0.424   |
| iLVM (gr/m <sup>2</sup> )      | 111.1 [95.1-142.9]                   | 79.2 [52.3-103.3]                     | 0.005   |
| 2D-iLVEDV (ml/m <sup>2</sup> ) | 61.4 [45.4-77.7]                     | 48.9 [40.5-61.6]                      | 0.003   |
| 2D-iLVESV (ml/m <sup>2</sup> ) | 25.2 [21.2-39.8]                     | 20.4 [14.75-30.8]                     | 0.182   |
| 2D-LVEF (%)                    | 59.1 [50.7-61.5]                     | 61.5 [50.0-63.9]                      | 0.477   |
| LV-S' (TDI) (cm/s)             | 8.0 [7.5-9.5]                        | 8.0 [6.0-10.0]                        | 0.157   |
| 2D-iLAV (ml/m <sup>2</sup> )   | 42.3 [34.2-51.7]                     | 36.3 [29.6-47.0]                      | 0.005   |
| PALS (%) [N=3]                 | 12.0 [4.0-17.0]                      | 21.0 [19.0-22.0]                      | 0.109   |
| TR Vmax (m/s)                  | 3.0 [2.5-3.1]                        | 2.0 [1.8-2.5]                         | 0.005   |
| EPSPAP (mmHg)                  | 40.0 [35.0-50.0]                     | 20.0 [15.0-25.0]                      | 0.003   |
| Basal RVD (mm)                 | 35.0 [31.0-40.0]                     | 32.0 [29.0-37.0]                      | 0.058   |
| Mid-cavity RVD (mm)            | 27.0 [25.0-34.0]                     | 26.0 [23.0-31.0]                      | 0.010   |
| Longitudinal RVD (mm)          | 59.0 [52.0-68.0]                     | 53.0 [47.0-60.0]                      | 0.005   |
| RA Area (cm <sup>2</sup> )     | 18.0 [15.0-23.0]                     | 14.0 [13.0-16.0]                      | 0.035   |
| FAC (%)                        | 37.0 [35.0-44.0]                     | 45.0 [43.0-47.0]                      | 0.016   |
| TAPSE (mm)                     | 20.0 [17.0-24.0]                     | 20.0 [18.0-26.0]                      | 0.072   |
| RV S' (TDI) (cm/s)             | 9.0 [8.0-13.7]                       | 9.0 [8.7-13.0]                        | 0.581   |
| RV-FWLS (%)                    | -21.0 [-15.1-23.0]                   | -23.0 [-24.0 - -22.0]                 | 0.141   |
| Secondary MR (n = 13)          |                                      |                                       |         |
| LVEDD (mm)                     | 60.0 [53.0-65.0]                     | 60.0 [50.0-63.0]                      | 0.058   |
| LVESD (mm)                     | 45.0 [40.5-52.0]                     | 47.0 [41.5-50.0]                      | 0.833   |
| RWT                            | 0.31 [0.26-0.37]                     | 0.33 [0.25-0.38]                      | 0.347   |

|                                |                            |                               |              |
|--------------------------------|----------------------------|-------------------------------|--------------|
| iLVM (gr/m <sup>2</sup> )      | 116.9 [96.2–136.4]         | 100.8 [58.2–141.6]            | 0.239        |
| 2D-iLVEDV (ml/m <sup>2</sup> ) | <b>76.4 [60.5–94.9]</b>    | <b>59.4 [44.8–91.2]</b>       | <b>0.002</b> |
| 2D-iLVESV (ml/m <sup>2</sup> ) | <b>50.2 [35.5–67.1]</b>    | <b>31.9 [23.1–53.9]</b>       | <b>0.004</b> |
| 2D-LVEF (%)                    | 42.4 [35.9–48.2]           | 46.3 [38.5–49.6]              | 0.433        |
| LV-S' (TDI) (cm/s)             | 6.5 [5.3–8.0]              | 8.0 [7.0–9.0]                 | 0.105        |
| 2D-iLAV (ml/m <sup>2</sup> )   | 53.8 [45.2–62.6]           | 50.7 [43.6–60.1]              | 0.213        |
| PALS (%) [N=5]                 | 10.0 [5.0–17.0]            | 6.8 [5.2–17.5]                | 0.500        |
| TR Vmax (m/s)                  | 2.9 [2.5–3.2]              | 2.4 [2.0–2.7]                 | 0.056        |
| EPSPAP (mmHg)                  | <b>42.5 [31.3–53.8]</b>    | <b>30.0 [20.0–35.0]</b>       | <b>0.005</b> |
| Basal RVD (mm)                 | <b>39.0 [37.0–43.0]</b>    | <b>34.0 [32.0–38.5]</b>       | <b>0.004</b> |
| Mid-cavity RVD (mm)            | <b>30.0 [26.0–35.0]</b>    | <b>28.0 [21.5–29.5]</b>       | <b>0.016</b> |
| Longitudinal RVD (mm)          | <b>65.0 [60.5–71.0]</b>    | <b>60.0 [57.5–63.0]</b>       | <b>0.012</b> |
| RA Area (cm <sup>2</sup> )     | <b>21.0 [17.5–25.0]</b>    | <b>18.0 [15.5–22.5]</b>       | <b>0.040</b> |
| FAC (%)                        | <b>34.0 [30.0–37.0]</b>    | <b>42.0 [34.0–48.5]</b>       | <b>0.009</b> |
| TAPSE (mm)                     | <b>14.0 [13.0–14.0]</b>    | <b>17.0 [14.5–19.0]</b>       | <b>0.005</b> |
| RV S' (TDI) (cm/s)             | 7.0 [6.0–10.8]             | 9.5 [8.3–12.8]                | 0.068        |
| RV-FWLS (%)                    | <b>-15.0 [-9.9 – 19.8]</b> | <b>- 19.5 [-16.0 – -22.5]</b> | <b>0.021</b> |

Legend: EPSPAP, estimated peak systolic pulmonary artery pressure; FAC, fractional area change; iLAV, indexed left atrial volume; iLVM, indexed left ventricular mass; iLVEDV, indexed left ventricular end-diastolic volume; iLVESV, indexed left ventricular end-systolic volume; iRVEDV, indexed right ventricular end-diastolic volume; iRVESV, indexed right ventricular end-systolic volume; LAEF, left atrial ejection fraction; LVEDD, left ventricular end-diastolic diameter; LVESD, left ventricular end-systolic diameter; LVEF, left ventricular ejection fraction; LV S', systolic velocity at the mitral annular; PALS, peak left atrial longitudinal strain; RA, right atrium; RVD, right ventricular diameter; RV-FWLS, right ventricle free wall longitudinal strain; RWT, relative wall thickness; TAPSE, tricuspid annular plane systolic excursion; TR, tricuspidal regurgitation.
